# Supplementary material for: The 28 Ser Amino Acid of Cucumber Mosaic Virus Movement Protein Has a Role in Symptom Formation and Plasmodesmata Localization
Source: PubMed Central journal article supplement (PMC7912182; doi:10.3390/v13020222), 2021-01-31
Supplement: viruses-13-00222-s001.pdf [file viruses-13-00222-s001.pdf]

Table S1. Primer sequences for cloning. The codons containing the mutations are underlined while the restriction enzymes used are in italics.

| Primer         | Sequence (5'-3')                                  |
|----------------|---------------------------------------------------|
| MP/S28Afor     | GGAGATCTTATTT <u>IGCC</u> CCTGAAGCCATTAAGAAAATGGC |
| MP/S28Arev     | GGAGATCTTTTGAAGATCGTCAGACGTATCCGCTGAGG            |
| MP/S28Dfor     | GGAGATCTTATTT <u>GACC</u> CCTGAAGCCATTAAGAAAATGGC |
| MP/S120Afor    | GGGAGCTCGCT <u>CCC</u> ATAGATGGGCAATGCGTTTCG      |
| MP/S120Arev    | GGGAGCTCCTTGTGCGCTAGATCAGCTAAGTAAATTCTCAA         |
| MP/S120Dfor    | GGGAGCTCGAT <u>CCC</u> ATAGATGGGCAATGCGTTTCG      |
| MPrev          | GCCGGATCCCTAAAGACCGTTAACCACCTGC                   |
| MPSaclfor      | GGGAGCTCATGGCTTTCCAAGGTACCAGT                     |
| MPeGFPprev     | CGCCCTTGCTCACCATAAGACCGTTAACCACCTGC               |
| MPeGFPfor      | GTGGTTAACGGTCTTATGGTGAGCAAGGGCGAGG                |
| eGFPBamHlrev   | CCGGATCCTCACTTGTACAGCTCGTCCATG                    |
| CMVMPpETfor    | GGCATATGGCTTTCCAAGGTACCAGTAG                      |
| CMVMPpETrev    | GCCGGATCCCTAAAGACCGTTAACCACCTGC                   |
| Cap. actin for | AGGGATGGGTCAAAGGATGC                              |
| Cap. actin rev | GAGACAACACCGCCTGAATAGC                            |

Table S2. Descriptive statistics, Levene's Test of Equality of Error Variances and Tests of Normality of the dataset examined

| Descriptive Statistics                       |       |                |          |
|----------------------------------------------|-------|----------------|----------|
| Mutants                                      | Mean  | Std. Deviation | N        |
| MP/S28A                                      | 0.499 | 0.015          | 15       |
| MP/S28D                                      | 0.861 | 0.052          | 15       |
| MP/S120A                                     | 6.363 | 0.304          | 15       |
| MP/S120D                                     | 8.344 | 0.552          | 15       |
| Rs-CMV                                       | 8.869 | 0.571          | 15       |
| Total                                        | 4.987 | 3.660          | 75       |
| Levene's Test of Equality of Error Variances |       |                |          |
| F                                            | df1   | df2            | Sig.     |
| 1688.542                                     | 4     | 70             | 0.000    |
| Tests of Normality                           |       |                | Skewness |
| Kolmogorov-Smirnov                           |       |                | 0.550    |
| Statistic                                    | df    | Sig.           | Kurtosis |
| 0.203                                        | 100   | 0.000          | 0.926    |

Figure S1. Sequence comparison of the 1-50 amino acids of plant viruses in the genus Cucumovirus. Ser 28 is indicated with a red rectangle. PSV: Peanut stunt virus, TAV: Tomato aspermy virus.

CMV-Ra (sg I) MAFQGTSRILTIQQSSAATSDDLQKILTSPEAIKKMATECDLGRHHWMRAD  
CMV-Tsh (sg II) MAFQGTSRILTIQQSSAASSDDLQKILTSPEAIKKMATECDLGRHHWMRAD  
PSV MAFSGSSRILTIQQSSAATSDDLHRILTSPEAIKEMATKCDLGRHHWMRAD  
TAV MAFSGTSRILSIQQSSAASTPELHNILTSRRAIQEMATKCDLGRHHWMRAD
